# Supplementary material for: Multicenter Retrospective Review of Ketamine Use in the ICU
Source: PubMed Central journal article supplement — Crit Care Explor. 2022 Feb 10;4(2):e0633. doi: 10.1097/CCE.0000000000000633 (PMC8843366; doi:10.1097/cce.0000000000000633), 2022-02-10
Supplement: cc9-4-e0633-s001.pdf [file cc9-4-e0633-s001.pdf]

## Supplemental Digital Content

### Methods:

Data collected to describe institution demographics included type of hospital, geographic location, total number of hospital and ICU beds, use of ICU pain/sedation and ketamine guidelines, and restrictions around ketamine use including need for ICU level of care and/or mechanical ventilation, and if titration is allowed by a nurse (Table S3). Type of pain, agitation, and delirium screening tools used by each institution were also collected (Table S4).

Data collected to describe patient demographics included median age, race, ethnicity, sex, weight, height, admitting diagnosis, co-morbidities, history of substance abuse, APACHE II score, allergies, intolerances or known clinical failure to other analgesics, sedatives, and antipsychotics, type of ICU, percentage requiring mechanical ventilation, vasopressors, and continuous neuromuscular blockers, hospital location where ketamine was initiated, and if ketamine was started before or after intubation (Table 1, S5, and S6)

Table S1 Adverse Effect Endpoint Definitions

| Hemodynamic Endpoint  | Definition                                                                                                                                                                                                                                                         |
|-----------------------|--------------------------------------------------------------------------------------------------------------------------------------------------------------------------------------------------------------------------------------------------------------------|
| Hypertension          | MAP > 105 mmHg, administration of an antihypertensive agent to treat acute hypertension, 25% decrease in vasopressor infusion rate, or decrease in two or more vasopressor infusion rates                                                                          |
| Hypotension           | MAP < 65 mmHg, start of a new vasopressor agent, administration of a fluid bolus > 500 ml to increase BP, 25% increase in any vasopressor infusion rate, or any increase in two or more vasopressor infusion rates                                                 |
| Tachycardia           | HR >120 BPM without an increase in vasopressor dose (norepinephrine, dopamine, epinephrine, or dobutamine) within 15 minutes prior to HR measurement, administration of a new antiarrhythmic or rate-controlling medication, or requiring electrical cardioversion |
| Bradycardia           | HR < 50 BPM not caused by administration of a rate controlling medication/antiarrhythmic within 15 minutes prior to HR measurement or administration of atropine                                                                                                   |
| Cardiac Abnormalities | Atrial fibrillation, ventricular tachycardia, ventricular fibrillation, myocardial infarction, or heart block                                                                                                                                                      |
| Emergence Reaction    | Chart documentation of hyperexcitability, restlessness, agitation, confusion, or hallucinations, prescription of a benzodiazepine or antipsychotic in the 4 hours surrounding CI ketamine                                                                          |

|                 |                                                                                                               |
|-----------------|---------------------------------------------------------------------------------------------------------------|
|                 | discontinuation, or new delirium presenting in the 4 hours after CI<br>ketamine discontinuation               |
| Oral secretions | Presence of copious secretions, need for increased suctioning, or<br>need for medication to manage secretions |

MAP: mean arterial pressure; BP: blood pressure; HR: heart rate; BPM: beats per minute; CI:  
continuous infusion

Definitions were decided upon study author's clinical knowledge and experience

Table S2 Patient Distribution by Institution

| Institution                                          | Number of Patients | Institution                              | Number of Patients |
|------------------------------------------------------|--------------------|------------------------------------------|--------------------|
| Advent Health                                        | 21                 | Parkview Regional Medical Center         | 56                 |
| Augusta University Medical Center                    | 44                 | Robert Wood Johnson University Hospital  | 21                 |
| Dartmouth-Hitchcock Medical Center                   | 13                 | Rush University Medical Center           | 1                  |
| Erie County Medical Center                           | 8                  | Sarasota Memorial Hospital               | 2                  |
| Flagstaff Medical Center/Northern Arizona Healthcare | 8                  | St. Dominic Hospital                     | 7                  |
| Froedtert Menomonee Falls Hospital                   | 32                 | Texas Health Harris Methodist Fort Worth | 42                 |
| Froedtert Hospital                                   | 1                  | University Hospital New Jersey           | 4                  |
| Inova Fairfax Medical                                | 1                  | University of Maryland Medical Center    | 10                 |
| Kaleida Health                                       | 3                  | University of New Mexico Hospital        | 1                  |
| Lakes Region General Hospital                        | 1                  | University of Rochester Medical Center   | 79                 |
| Loma Linda University Health                         | 1                  | Vidant Medical Center                    | 16                 |
| Lutheran Health Network                              | 12                 | Wellstar Cobb Hospital                   | 1                  |

|                                                    |   |  |  |
|----------------------------------------------------|---|--|--|
| Mercy Hospital St Louis/<br>Saint Louis University | 5 |  |  |
|----------------------------------------------------|---|--|--|

Table S3: Institutional Demographics (n=25)

| Demographics                                         | n (%)     |
|------------------------------------------------------|-----------|
| Type of hospital                                     |           |
| University teaching                                  | 13 (52)   |
| Community non-teaching                               | 8 (32)    |
| Community teaching                                   | 4 (16)    |
| Hospital location region <sup>a</sup>                |           |
| Northeast                                            | 8 (32)    |
| Southeast                                            | 7 (28)    |
| Midwest                                              | 6 (24)    |
| Southwest                                            | 3 (12)    |
| West                                                 | 1 (4)     |
| Total hospital beds                                  |           |
| 101-249                                              | 2 (8)     |
| 250-499                                              | 6 (24)    |
| 500-749                                              | 10 (40)   |
| 750-1000                                             | 6 (24)    |
| >1000                                                | 1 (4)     |
| Total ICU beds (excluding neonatal ICU)              |           |
| <10                                                  | 1 (4)     |
| 11-25                                                | 1 (4)     |
| 26-50                                                | 7 (28)    |
| 51-75                                                | 6 (24)    |
| >75                                                  | 10 (40)   |
| Indications included in CI ketamine guideline (n=17) |           |
| ICU pain and agitation                               | 17 (100)  |
| Intractable pain/acute pain only                     | 10 (58.8) |
| Status epilepticus                                   | 5 (29.4)  |
| Status asthmaticus                                   | 3 (17.6)  |
| Palliative care                                      | 1 (5.9)   |
| ICU admission required for CI ketamine, yes          | 12 (48)   |
| Non-ICU locations CI ketamine allowed (n=13)         |           |
| Step-down/PCU                                        | 12 (92)   |
| Emergency room                                       | 10 (77)   |
| Floor                                                | 8 (62)    |
| MV requirement for CI ketamine, yes                  |           |
| Invasive or non-invasive                             | 15 (60)   |
| Invasive only                                        | 10 (40)   |
| Titratable nursing administration permitted, yes     | 18 (72)   |

Presented as n (%); Abbreviations: ICU: intensive care unit; CI: continuous infusion; PCU: progressive care unit; MV: mechanical ventilation

<sup>a</sup>Regions: Northeast [Maine, Massachusetts, Rhode Island, Connecticut, New Hampshire, Vermont, New York, Pennsylvania, New Jersey, Delaware, Maryland]; Southeast [West Virginia, Virginia, Kentucky, Tennessee, North Carolina, South Carolina, Georgia, Alabama,

Mississippi, Arkansas, Louisiana, Florida]; Midwest [Ohio, Indiana, Michigan, Illinois,  
Missouri, Wisconsin, Minnesota, Iowa, Kansas, Nebraska, South Dakota, North Dakota];  
Southwest [Texas, Oklahoma, New Mexico, Arizona]; West [Colorado, Wyoming, Montana,  
Idaho, Washington, Oregon, Utah, Nevada, California, Alaska, Hawaii]

Table S4: Institutional Pain, Sedation and Agitation, and Delirium Assessment Tools (n=25)

| Institutional Practices                              | n (%)   |
|------------------------------------------------------|---------|
| Institutional scale for pain assessment              |         |
| CPOT                                                 | 15 (60) |
| NRPS                                                 | 10 (40) |
| BPS                                                  | 5 (20)  |
| NVPS                                                 | 3 (12)  |
| MOPAT                                                | 1 (4)   |
| CNPI                                                 | 1 (4)   |
| DVPRS                                                | 1 (4)   |
| PAINAD                                               | 1 (4)   |
| Wong-baker                                           | 1(4)    |
| Other                                                | 1 (4)   |
| None                                                 | 3 (12)  |
| Institutional scale for sedation assessment          |         |
| RASS                                                 | 22 (88) |
| SAS                                                  | 3 (12)  |
| Institutional screening tool for delirium assessment |         |
| CAM-ICU                                              | 24 (96) |
| ICU-DSC                                              | 0 (0)   |
| None                                                 | 1 (4)   |

Abbreviations: CPOT: critical care pain observation tool; NRPS: numerical rating scale 1-10;

BPS: behavioral pain scale; NVPS: nonverbal pain scale; MOPAT: multidimensional objective pain assessment; CNPI: checklist of nonverbal pain indicators; DVPRS: defense and veterans pain rating scale; PAINAD: pain assessment in advanced dementia scale; RASS: Richmond Agitation and Sedation Scale; SAS: Riker Sedation Agitation Scale; CAM-ICU: confusion assessment method for the ICU; ICU-DSC: intensive care unit delirium screening checklist



Table S5: Additional Baseline Demographics (n=390)

| Demographics                                                         | n (%)      |
|----------------------------------------------------------------------|------------|
| <b>Co-morbidities<sup>a</sup></b>                                    |            |
| Kidney disease (acute or chronic)                                    | 56 (14.4)  |
| Thyroid disorder                                                     | 32 (8.2)   |
| Seizure                                                              | 30 (7.7)   |
| Heart failure                                                        | 30 (7.7)   |
| Tachyarrhythmia                                                      | 28 (7.2)   |
| Hepatic failure/cirrhosis                                            | 20 (5.1)   |
| Head injury                                                          | 19 (4.9)   |
| Stroke                                                               | 14 (3.6)   |
| Intracranial mass/Increased ICP                                      | 13 (3.3)   |
| Glaucoma/increased ocular pressure                                   | 3 (0.8)    |
| None                                                                 | 153 (39.2) |
| <b>Psychiatric illness</b>                                           |            |
| Depression                                                           | 46 (11.8)  |
| Bipolar                                                              | 13 (3.3)   |
| Schizophrenia                                                        | 9 (2.3)    |
| Other psychiatric illness                                            | 37 (9.5)   |
| <b>Substance abuse</b>                                               |            |
| Alcohol                                                              | 44 (11.3)  |
| Opioids                                                              | 35 (9.0)   |
| Marijuana/Synthetic cannabinoids                                     | 24 (6.2)   |
| Cocaine                                                              | 15 (3.8)   |
| Benzodiazepines                                                      | 8 (2.1)    |
| Amphetamines                                                         | 2 (0.5)    |
| Other                                                                | 5 (1.3)    |
| <b>Medication Allergies, Intolerances, or Known Clinical Failure</b> |            |
| Benzodiazepines                                                      | 7 (1.8)    |
| Propofol                                                             | 8 (2.1)    |
| Dexmedetomidine                                                      | 6 (1.5)    |
| Haloperidol                                                          | 5 (1.3)    |
| Atypical antipsychotics                                              | 5 (1.3)    |
| None                                                                 | 365 (93.6) |
| <b>Consult Service Recommending Ketamine</b>                         |            |
| Yes                                                                  | 70 (18.0)  |
| Unknown                                                              | 28 (7.2)   |
| <b>Type of Consult Service</b>                                       |            |
| Acute pain                                                           | 42 (60.0)  |
| Anesthesia                                                           | 8 (11.4)   |
| Cardiovascular/thoracic surgery                                      | 2 (2.9)    |
| Critical care-pulmonology                                            | 3 (4.3)    |
| Critical care-surgery                                                | 1 (1.4)    |
| Neurocritical care                                                   | 5 (7.1)    |
| Pharmacy                                                             | 7 (10.0)   |
| Trauma surgery                                                       | 2 (2.9)    |

Presented as n (%); Abbreviations: ICP: Intracranial pressure

<sup>a</sup>Only comorbidities that would potentially effect ketamine use were collected.

Table S6: Primary Admitting Diagnosis

| Diagnosis                       | n (%)     |
|---------------------------------|-----------|
| Trauma                          | 93 (23.8) |
| Respiratory failure             |           |
| Non-asthma                      | 69 (17.7) |
| Asthma                          | 17 (4.4)  |
| Post-operative care             |           |
| Non-cardiac surgery (elective)  | 27 (6.9)  |
| Cardiac surgery                 | 10 (2.6)  |
| Non-cardiac surgery (emergent)  | 8 (2.1)   |
| Shock                           |           |
| Septic                          | 33 (8.5)  |
| Cardiogenic                     | 4 (1.0)   |
| Hemorrhagic (non-intracranial)  | 2 (0.5)   |
| Other                           | 2 (0.5)   |
| Cardiac emergency <sup>a</sup>  | 24 (6.2)  |
| Gastrointestinal <sup>b</sup>   | 12 (3.1)  |
| Seizure                         | 10 (2.6)  |
| Toxic ingestion                 | 10 (2.6)  |
| Acute pain                      | 9 (2.3)   |
| Encephalopathy                  | 7 (1.8)   |
| Stroke-Hemorrhagic              | 7 (1.8)   |
| Burn                            | 6 (1.5)   |
| Infection, non-sepsis           | 6 (1.5)   |
| Oncologic emergency             | 6 (1.5)   |
| Hepatic failure/Biliary disease | 4 (1.0)   |
| Solid organ transplant          | 4 (1.0)   |
| Sickle cell disease             | 3 (0.8)   |
| Renal failure                   | 2 (0.5)   |
| Stroke-Ischemic                 | 2 (0.5)   |
| Endocrine emergency             | 1 (0.3)   |
| Other                           | 12 (3.1)  |

Presented as n (%).

<sup>a</sup> Cardiac emergency, including aortic dissection/aneurysm, arrhythmia, cardiac arrest, heart failure/pulmonary edema, hypertensive emergency, and myocardial infarction

<sup>b</sup> Gastrointestinal, including bleeding (non-shock), perforation, pneumatosis, obstruction, pancreatitis

Table S7: Baseline Analgesic, Sedative, and Antipsychotic Use (n=351)

| Analgesics, Sedatives, and Antipsychotics | n (%)      |
|-------------------------------------------|------------|
| IV or PO PRN Opioids                      |            |
| Fentanyl                                  | 121 (34.5) |
| Hydromorphone                             | 64 (18.2)  |
| Oxycodone                                 | 35 (10.0)  |
| Morphine                                  | 32 (9.1)   |
| Hydrocodone                               | 22 (6.3)   |
| Methadone                                 | 3 (0.9)    |
| Meperidine                                | 2 (0.6)    |
| Tramadol                                  | 1 (0.3)    |
| IV or PO PRN Sedatives                    |            |
| Midazolam                                 | 82 (23.4)  |
| Lorazepam                                 | 42 (12.0)  |
| Diazepam                                  | 11 (3.1)   |
| Clonazepam                                | 6 (1.7)    |
| Propofol                                  | 6 (1.7)    |
| Alprazolam                                | 2 (0.6)    |
| Diphenhydramine                           | 1 (0.3)    |
| IV or PO PRN Antipsychotics               |            |
| Haloperidol                               | 16 (4.6)   |
| Atypical antipsychotics                   | 11 (3.1)   |
| IV or PO PRN Medications, None            | 110 (31.3) |
| IV, PO or Transdermal ATC Opioids         |            |
| Fentanyl (IV or transdermal)              | 29 (8.3)   |
| Hydromorphone                             | 23 (6.6)   |
| Oxycodone                                 | 22 (6.3)   |
| Methadone                                 | 7 (2.0)    |
| Morphine                                  | 6 (1.7)    |
| Hydrocodone                               | 1 (0.3)    |
| IV or PO ATC Sedatives                    |            |
| Midazolam                                 | 23 (6.6)   |
| Lorazepam                                 | 12 (3.4)   |
| Diazepam                                  | 7 (2.0)    |
| Clonazepam                                | 4 (1.1)    |
| Alprazolam                                | 2 (0.6)    |
| Zolpidem                                  | 1 (0.3)    |
| IV or PO ATC Antipsychotics               |            |
| Atypical antipsychotics                   | 19 (5.4)   |
| Haloperidol                               | 6 (1.7)    |
| IV or PO ATC Medications, None            | 245 (69.8) |
| Continuous Infusion Opioids               |            |
| Fentanyl                                  | 182 (51.9) |
| Hydromorphone                             | 17 (4.8)   |
| Morphine                                  | 7 (2.0)    |
| Continuous Infusion Sedatives             |            |
| Propofol                                  | 129 (36.8) |
| Dexmedetomidine                           | 94 (26.8)  |
| Midazolam                                 | 72 (20.5)  |

|                                                |            |
|------------------------------------------------|------------|
| Lorazepam                                      | 3 (0.9)    |
| Continuous Infusion Medications, None          | 86 (24.5)  |
| Adjunctive Non-opioid Analgesics and Sedatives |            |
| No adjunctive agents                           | 182 (51.9) |
| Acetaminophen                                  | 138 (39.3) |
| Gabapentin                                     | 38 (10.8)  |
| Lidocaine                                      | 16 (4.6)   |
| Non-steroidal anti-inflammatory drugs          | 15 (4.3)   |
| Methocarbamol                                  | 10 (2.8)   |
| Pregabalin                                     | 8 (2.3)    |
| Cyclobenzaprine                                | 6 (1.7)    |
| Baclofen                                       | 4 (1.1)    |
| Tizanidine                                     | 2 (0.6)    |
| Amitriptylline                                 | 1 (0.3)    |
| Bupivacaine, liposomal                         | 1 (0.3)    |
| Buspirone                                      | 1 (0.3)    |
| Carbamazepine                                  | 1 (0.3)    |
| Clonidine                                      | 1 (0.3)    |
| Memantine                                      | 1 (0.3)    |
| Valproate                                      | 1 (0.3)    |

Abbreviations: IV: Intravenous; PO: By mouth; PRN: As needed; ATC: Scheduled around the clock

Table S8. Continuous Infusion Ketamine Daily Doses, Minimum/Maximum Doses, and Volume

Infused

| Day                          | First 24 hours          | 25-48 hours             | Day 3                   | Day 4                   | Day 5                   | Day 6                   | Day 7                    |
|------------------------------|-------------------------|-------------------------|-------------------------|-------------------------|-------------------------|-------------------------|--------------------------|
| n                            | 382                     | 224                     | 133                     | 78                      | 59                      | 41                      | 31                       |
| Cumulative Daily Dose: mg    | 517.5<br>(187.4-1206.3) | 555.3<br>(233.3-1674.0) | 616.0<br>(196.8-1772.6) | 857.5<br>(440.5-2326.6) | 816.0<br>(391.6-1771.7) | 950.4<br>(583.2-1773.6) | 1152.0<br>(695.2-2106.3) |
| Daily Dose: mg/kg/hr         | 0.3<br>(0.2-0.8)        | 0.4<br>(0.2-0.9)        | 0.4<br>(0.2-0.9)        | 0.5<br>(0.3-1)          | 0.5<br>(0.3-0.9)        | 0.6<br>(0.3-1)          | 0.6<br>(0.4-1)           |
| Daily Dose: mg/hr            | 27.4<br>(12.2-63.5)     | 29.5<br>(15.1-75.0)     | 33.0<br>(16.5-83.3)     | 39.6<br>(22.8-111.0)    | 39.6<br>(21.2-99.0)     | 45.9<br>(29.1-105.6)    | 48.9<br>(32.1-95.6)      |
| Minimum Daily Dose: mg/kg/hr | 0.2<br>(0.1-0.4)        | 0.3<br>(0.1-0.6)        | 0.3<br>(0.2-0.9)        | 0.3<br>(0.2-0.9)        | 0.4<br>(0.2-0.7)        | 0.4<br>(0.3-0.7)        | 0.5<br>(0.2-0.6)         |
| Minimum Daily Dose: mg/hr    | 16.5<br>(7.1-32.8)      | 22.6<br>(9.7-54.5)      | 28.2<br>(11.6-63.3)     | 33.0<br>(17.1-73.4)     | 32.6<br>(17.3-69.9)     | 39.7<br>(23.1-81.6)     | 34.0<br>(16.2-56.2)      |
| Maximum Daily Dose: mg/kg/hr | 0.5<br>(0.2-1)          | 0.4<br>(0.2-1)          | 0.5<br>(0.2-1)          | 0.6<br>(0.3-1.2)        | 0.5<br>(0.3-1)          | 0.6<br>(0.4-1.5)        | 0.7<br>(0.4-1.2)         |
| Maximum Daily Dose: mg/hr    | 34.1<br>(17.6-81.2)     | 33.0<br>(17.9-80.4)     | 37.6<br>(18.6-92.3)     | 48.7<br>(28.4-119.6)    | 40.2<br>(24.2-112.2)    | 48.8<br>(30.6-126.5)    | 62.3<br>(38.9-106.4)     |
| Volume infused: ml           | 276.5<br>(104.0-721.5)  | 321.2<br>(117.8-892.0)  | 306.6<br>(110.3-886.3)  | 495.5<br>(212.5-938.7)  | 475.2<br>(216.6-852.6)  | 425.0<br>(243.6-822.1)  | 583.2<br>(330.9-1011.6)  |

Presented as median (IQR)

Table S9: Hemodynamic Changes and Cardiac Abnormalities Associated with Continuous Infusion Ketamine

| Cardiovascular Effect            | Baseline  | 4 hour     | 5-24 hour  | 25-48 hour | p-value |
|----------------------------------|-----------|------------|------------|------------|---------|
| Hypertension (n=221)             |           | 53 (24.0%) | 83 (37.6%) | 89 (40.3%) | <0.001  |
| Hypotension (n=221)              |           | 52 (23.5%) | 69 (31.2%) | 54 (24.4%) | 0.053   |
| Tachycardia (n=221)              |           | 43 (19.5%) | 56 (25.3%) | 50 (22.6%) | 0.142   |
| Bradycardia (n=221)              |           | 5 (2.3%)   | 10 (4.5%)  | 7 (3.2%)   | 0.232   |
| A-fib/flutter (n=390)            | 18 (4.6%) | 10 (2.6%)  | 11 (2.8%)  | 9 (2.3%)   | 0.013   |
| Ventricular tachycardia (n=390)  | 7 (1.8%)  | 7 (1.8%)   | 8 (2.1%)   | 4 (1.0%)   | 0.463   |
| Ventricular fibrillation (n=390) | 1 (0.3%)  | 0 (0.0%)   | 0 (0.0%)   | 0 (0.0%)   | 0.392   |
| Myocardial infarction (n=390)    | 0 (0.0%)  | 0 (0.0%)   | 0 (0.0%)   | 0 (0.0%)   | N/A     |
| Heart block (n=390)              | 3 (0.8%)  | 3 (0.8%)   | 1 (0.3%)   | 2 (0.5%)   | 0.392   |

Presented as total n (%) during the listed time frame

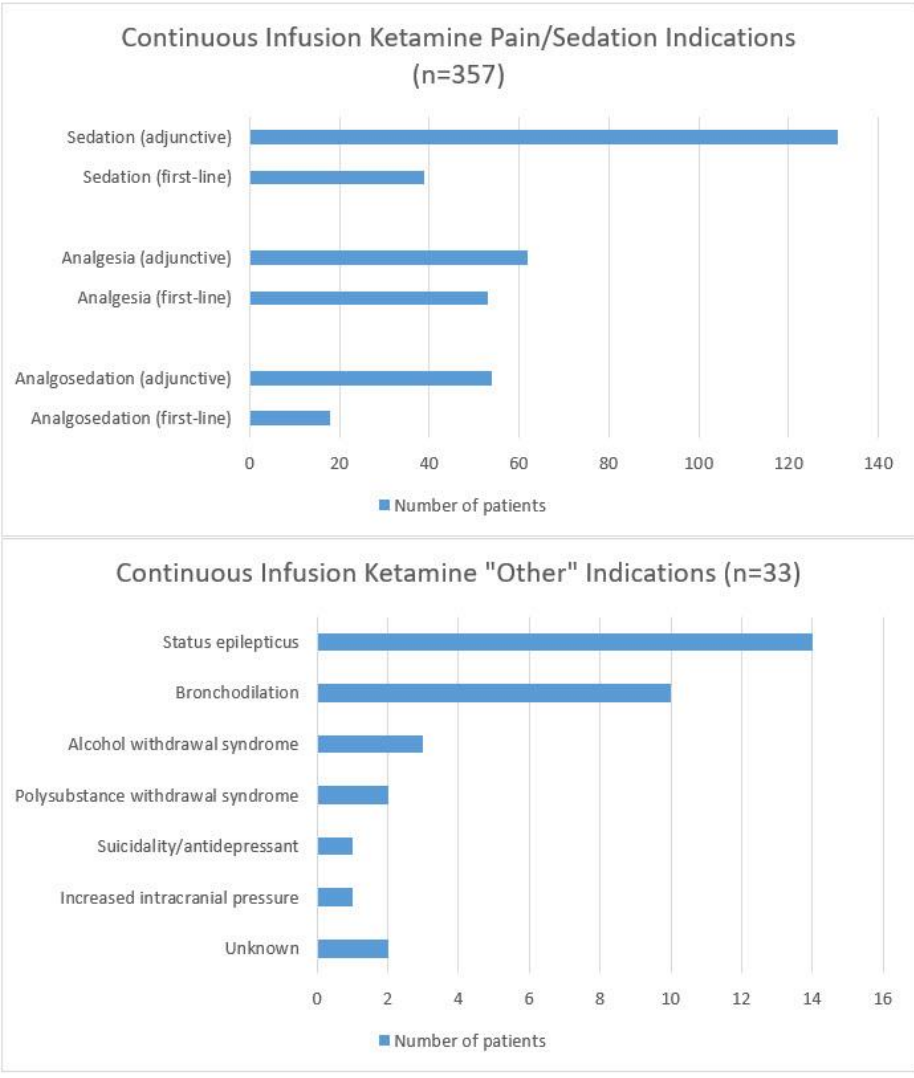

Figure 1. Schematic representation of the indications for continuous infusion ketamine. The top figure shows the number of patients receiving adjunctive or first-line ketamine for sedation, analgesia, or analgosedation. The bottom figure shows the number of patients receiving ketamine for other indications. Sedation was defined as the use of ketamine for the sole purpose of providing sedation in patients with uncontrolled agitation. Analgesia was defined as the use of ketamine for the sole purpose of providing analgesia and typically started at lower doses below 0.5 mg/kg/hr. Analgosedation was defined as the use of ketamine for both its analgesic and sedative effects or when it was unclear if it was solely being used for analgesia versus sedation.



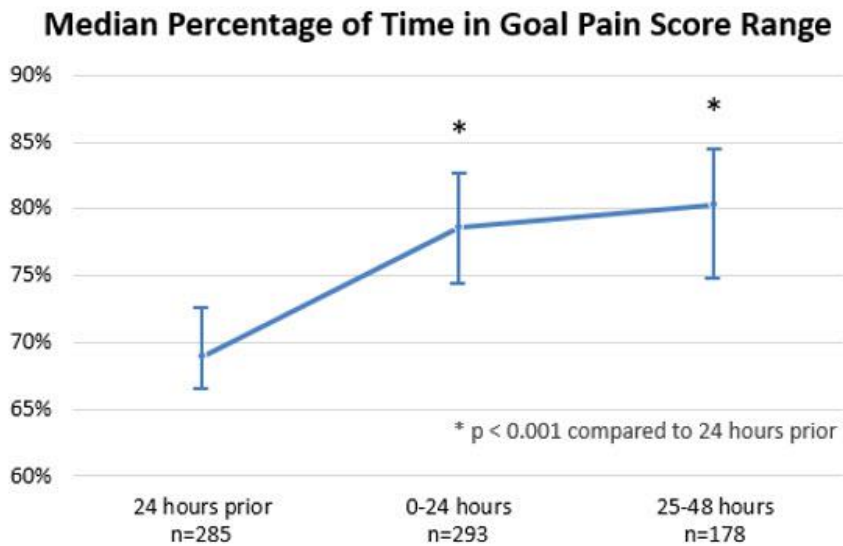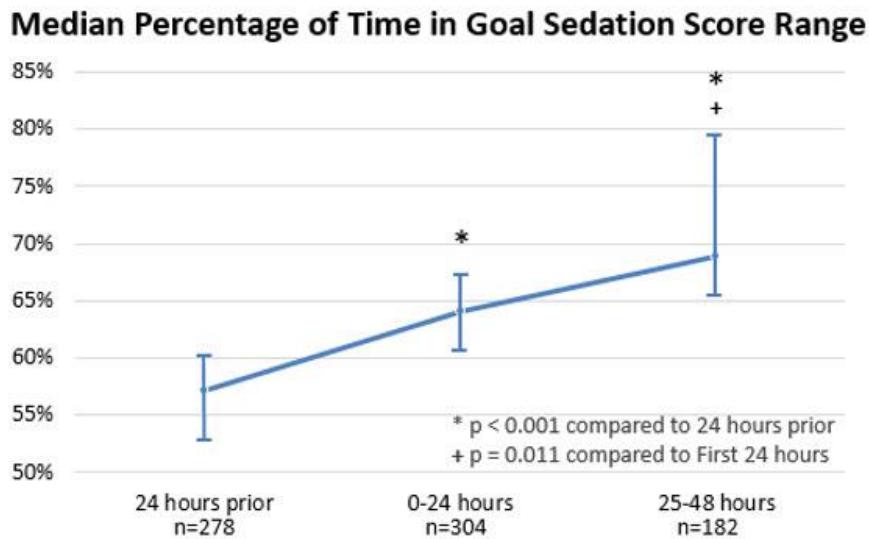

Figure 2. Schematic representation of time spent in goal pain and sedation score range with the use of continuous infusion (CI) ketamine. The top figure shows the median [IQR] percentage of time spent in goal pain score range in the 24 hours prior to CI ketamine compared to the 0-24 hours and the 25-48 hours after. The bottom figure shows the median [IQR] percentage of time spent in goal sedation score range in the 24 hours prior to CI ketamine compared to the 0-24 hours and the 25-48 hours after.

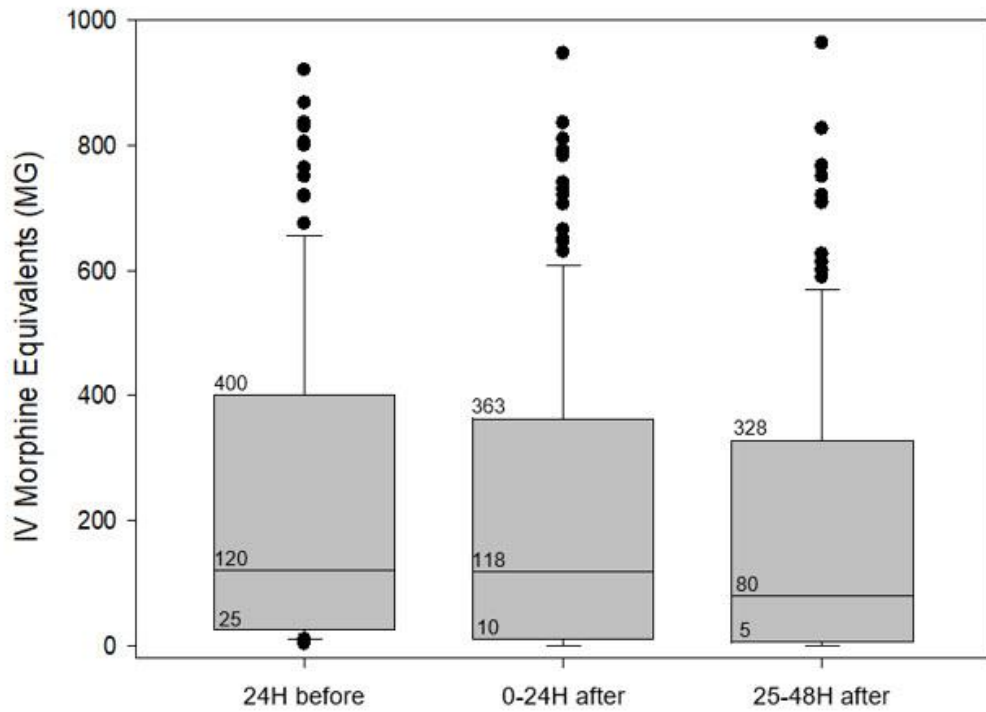

N=187

P=0.005 by Tukey One-Way Repeated Measures ANOVA

Figure 3. Schematic representation of the effect of continuous infusion (CI) ketamine on analgesic requirements. The figure shows the median [IQR] intravenous morphine equivalents in mg during the 24 hours prior to CI ketamine compared to the 0-24 hours and the 25-48 hours after.

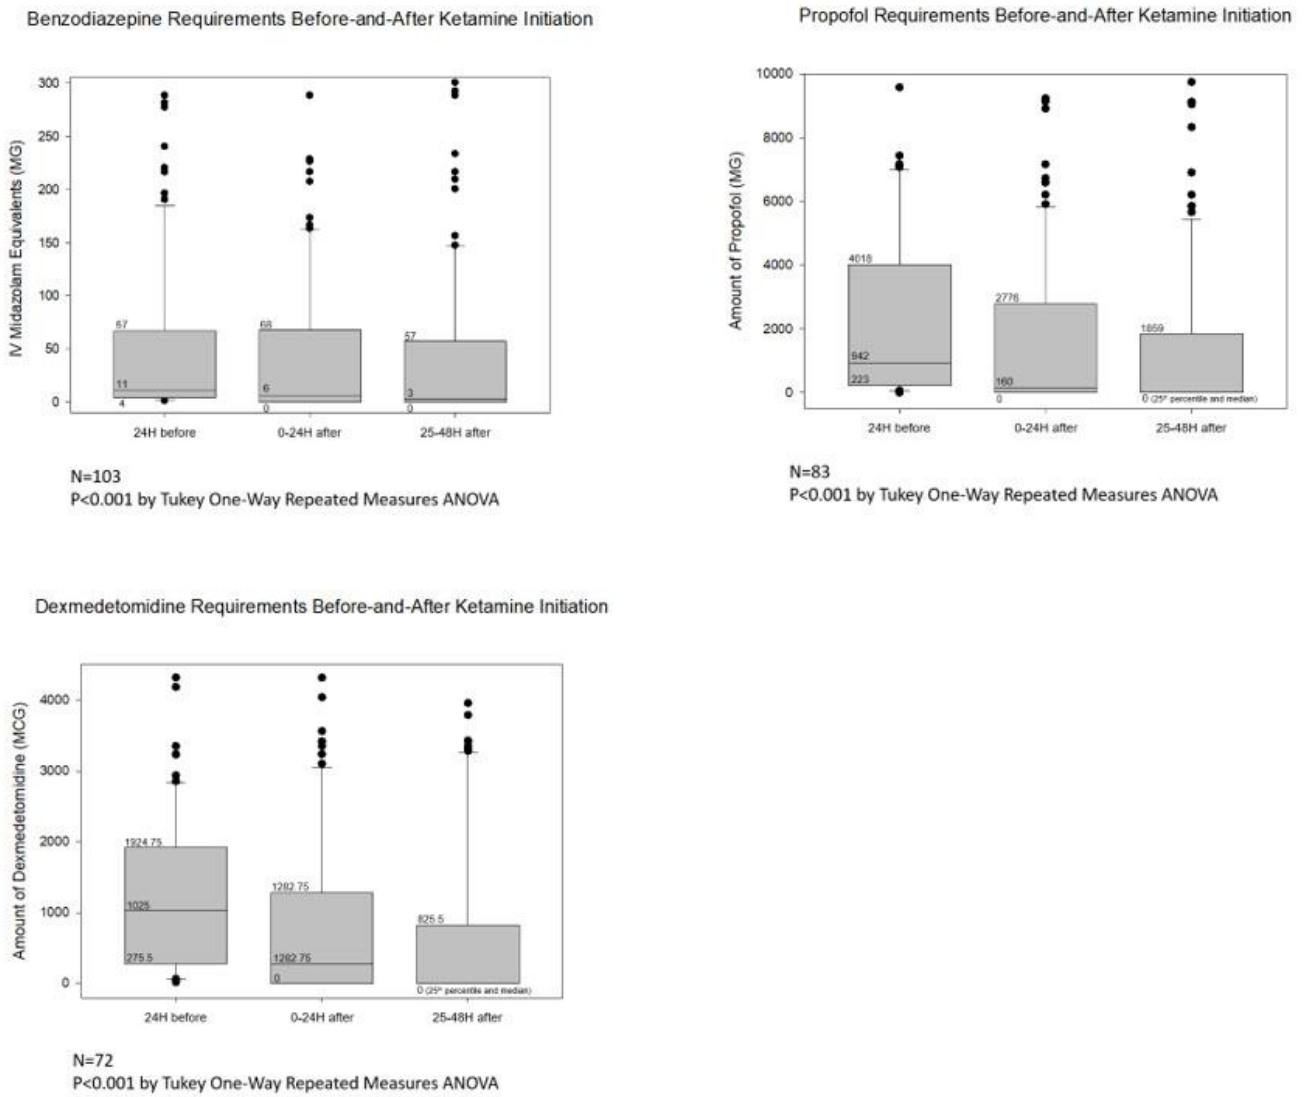

Figure 4. Schematic representation of the effect of continuous infusion (CI) ketamine on sedative requirements. The top figure shows the median [IQR] intravenous midazolam equivalents in mg during the 24 hours prior to CI ketamine compared to the 0-24 hours and the 25-48 hours after. The middle figure shows the median [IQR] propofol equivalents in mg during the 24 hours prior to CI ketamine compared to the 0-24 hours and the 25-48 hours after. The bottom figure shows the median [IQR] dexmedetomidine equivalents in mcg during the 24 hours prior to CI ketamine compared to the 0-24 hours and the 25-48 hours after.

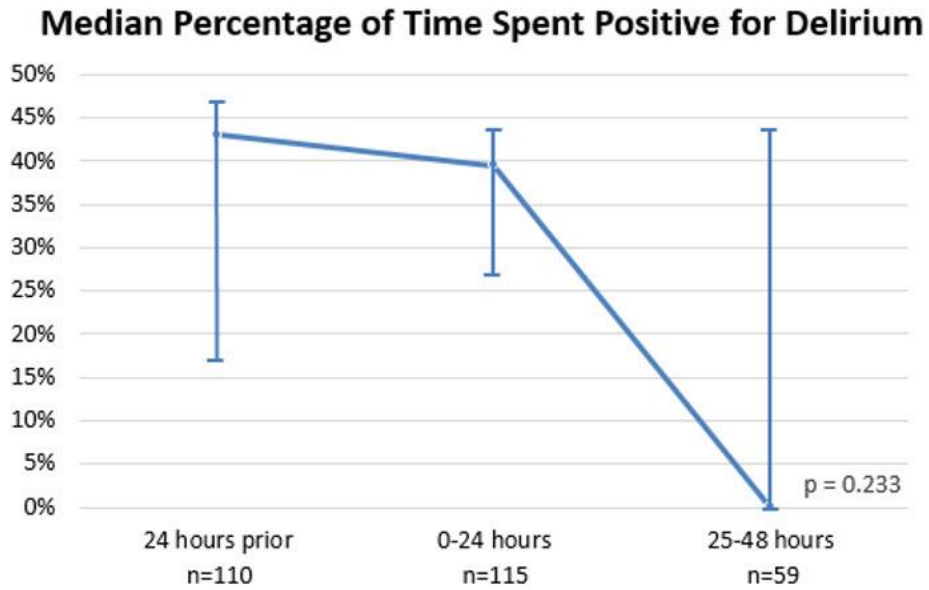

Figure 5. Schematic representation of time spent in positive for delirium with the use of continuous infusion (CI) ketamine. The figure shows the median [IQR] percentage of time spent positive for delirium in the 24 hours prior to CI ketamine compared to the 0-24 hours and the 25-48 hours after.
